# Supplementary material for: Exposure to Glycolytic Carbon Sources Reveals a Novel Layer of Regulation for the MalT Regulon
Source: Hindawi journal article supplement (doi:10.1155/2011/107023), 2011-01-01
Supplement: f2 [file 107023.f2.pdf]

1 **Supplemental Table S1: Survival of the *ompR malt<sup>con</sup>* double mutant**  
2 **in the presence of various carbon sources.** The relative catabolite  
3 repressing strength and glycolysis association of the carbon sources as well as the  
4 resulting death phenotype are indicated with “+” and ”-“.  
5

| Carbon source | Catabolite-repression | glycolytic | survival |
|---------------|-----------------------|------------|----------|
| Glucose       | +++                   | +++        | +++      |
| Fructose      | +++                   | +++        | +++      |
| Mannitol      | +++                   | +++        | +++      |
| Glucuronate   | +++                   | +++        | +++      |
| Pyruvate      | ++                    | +++        | +++      |
| Sorbitol      | +                     | +++        | ++       |
| Mannose       | +                     | +++        | +++      |
| Serine        | -                     | +++        | +++      |
| Maltose       | -                     | +++        | +++      |
| Succinate     | -                     | -          | -        |
| Aspartate     | -                     | -          | -        |
| Tryptophan    | -                     | -          | -        |
| Glutamate     | -                     | -          | -        |
| Glycine       | -                     | -          | -        |
| Proline       | -                     | -          | -        |
| Betaine       | -                     | -          | -        |

6

## 7 **Supplemental Figure Legends**

8

### 9 **Supplemental Figure 1. Effect of carbon sources on LamB expression.**

10 Addition of carbon sources reduces LamB levels in (a) *ompR malt<sup>con</sup>* and (b)  
11 *malt<sup>con</sup>* mutants as determined by outer membrane preparations. Cells were  
12 grown in LB at 37 °C and harvested during late exponential phase. Gels were  
13 stained with Coomassie brilliant blue. Lane 1, LB no carbon source (LB); lane  
14 2, LB 22 mM maltose (LB mal); lane 3, LB 22 mM glucose (LB gluc); lane 4,  
15 LB 22 mM sorbitol (LB sor).

16

### 17 **Supplemental Figure 2. Effect of maltose on LamB expression.**

18 Addition of maltose increases LamB levels in WT cells (lane 1 & 2) and the  
19 *ompR* mutant (lane 3 & 4) as determined by outer membrane preparations.  
20 Cells were grown in LB at 37 °C and harvested during late exponential phase.  
21 Gels were stained with Coomassie brilliant blue. Lane 1, WT cells no carbon  
22 source (LB); lane 2, WT cells 22 mM maltose (LB mal); lane 3, *ompR* mutant  
23 no carbon source (LB); lane 4, *ompR* mutant 22 mM maltose (LB mal).

24

### 25 **Supplemental Figure 3. Carbon sources do not act through the**

26 **regulators Mlc or StpA.** Growth curves of the triple mutants *ompR*  
27 *malt<sup>con</sup>mlc* (strain AJW3936) (a) and *ompR malt<sup>con</sup>stpA* (strain AJW4028)  
28 (b) grown in LB at 37 °C without sugars (white diamonds) or supplemented  
29 with 22 mM glucose (black circles), maltose (medium gray diamonds), or

30 sorbitol (light gray triangles). Values represent the mean of triplicates. Error  
31 bars are only shown when greater than the symbol.

32

33 **Supplemental Figure 4. Carbon sources do not act through the**

34 **inhibitors MalK, MalY, Aes, or glucokinase.** Growth curves of the triple

35 mutants *ompR malT<sup>con</sup>malK* (strain AJW3967) (a), *ompR malT<sup>con</sup>malY*

36 mutants (strain AJW3943) (b), *ompR malT<sup>con</sup>aes* (strain AJW3947) (c), or the

37 quadruple mutant *ompR malT<sup>con</sup>malK glk* (strain AJW4286) (d) grown in LB

38 at 37 °C without sugars (white diamonds) or supplemented with 22 mM

39 glucose (black circles), maltose (medium gray diamonds), or sorbitol (light

40 gray triangles). Values represent the mean of triplicates. Error bars are only

41 shown when greater than the symbol. Since *glk* and *malK* mutants cannot

42 metabolize/import maltose, these mutants were only grown in the presence of

43 glucose or sorbitol.

44

45

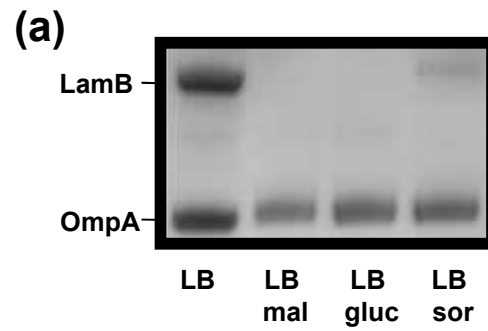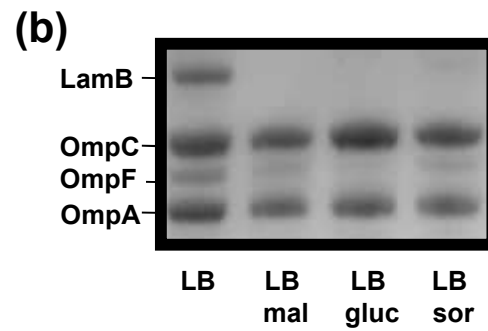

Reimann & Wolfe Supplemental Figure 1

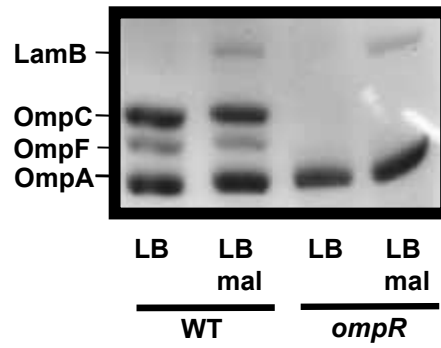

Reimann & Wolfe Supplemental Figure 2

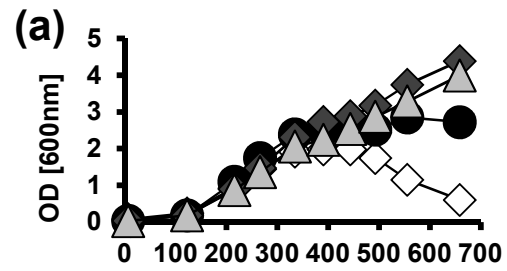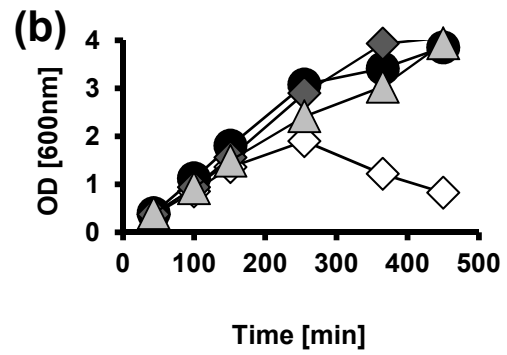

Reimann & Wolfe Supplemental Figure 3

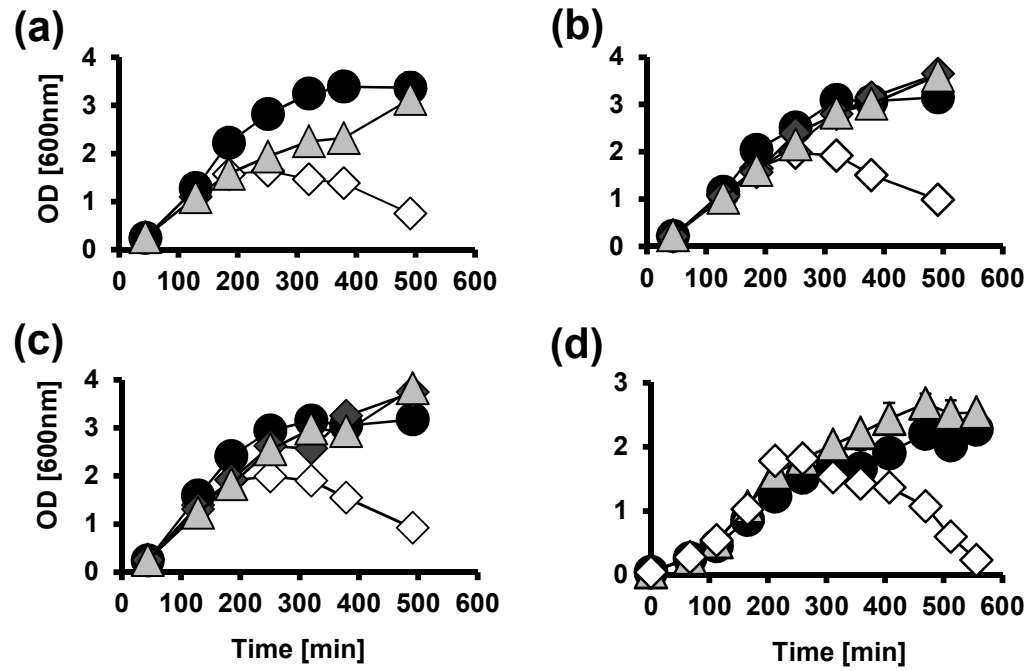

Reimann & Wolfe Supplemental Figure 4
